# Supplementary material for: The Effect of Vibratory Grinding Time on Moisture Sorption, Particle Size Distribution, and Phenolic Bioaccessibility of Carob Powder
Source: MDPI journal article supplement (doi:10.3390/molecules27227689), 2022-11-09
Supplement: s1 [file s1]

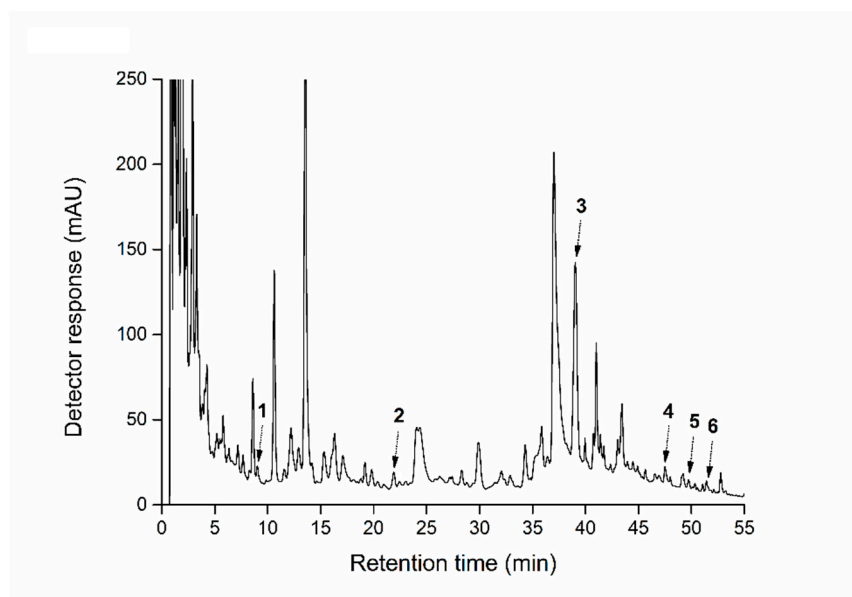

**Figure S1.** Chromatogram of vibratory ground carob powder (CP180). Kinetex XB-C18 100 Å (15 cm × 2.1 mm × 1.7 μm); mobile phase: (A) deionized water with formic acid addition (pH ~ 3.1) and (B) acetonitrile; gradient elution: 0 min – 3% (B), 34 min – 12% (B), 55 min – 30% (B), 60-70 min – 90% (B); injection volume of 2 μL; flow rate of 400 μL min<sup>-1</sup>; temperature of 40 °C; detection at 270, 290 and 320 nm. Quantified compounds: vanillic acid (**1**), ferulic acid (**2**), cinnamic acid (**3**), luteolin (**4**), naringenin (**5**) and apigenin (**6**).
